# Supplementary material for: Early diagnosis of infantile-onset lysosomal acid lipase deficiency in the advent of available enzyme replacement therapy
Source: PubMed Central journal article supplement (PMC6692931; doi:10.1186/s13023-019-1129-y), 2019-08-14
Supplement: 13023_2019_1129_MOESM1_ESM.pdf [file 13023_2019_1129_MOESM1_ESM.pdf]

# Weight for age percentiles (Boys, birth to 36 months)

Weight-for-age Percentiles (Boys, birth to 36 months)

100 % 100 %

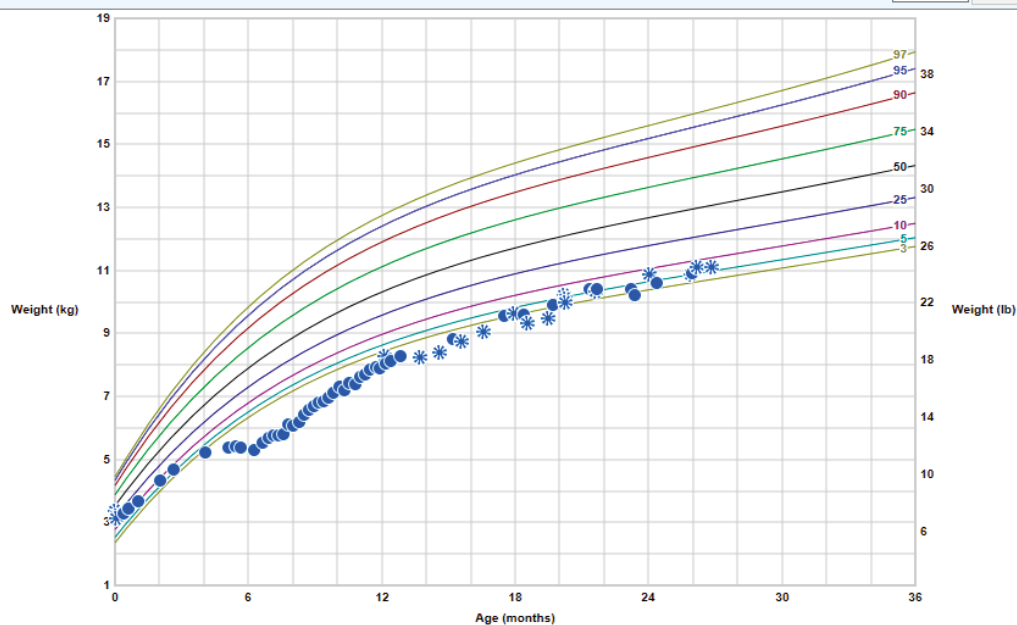

# Length for age percentiles (Boys, birth to 36 months)

Source: Centers for Disease Control and

Length-for-age Percentiles (Boys, birth to 36 months)

100 % 100 %

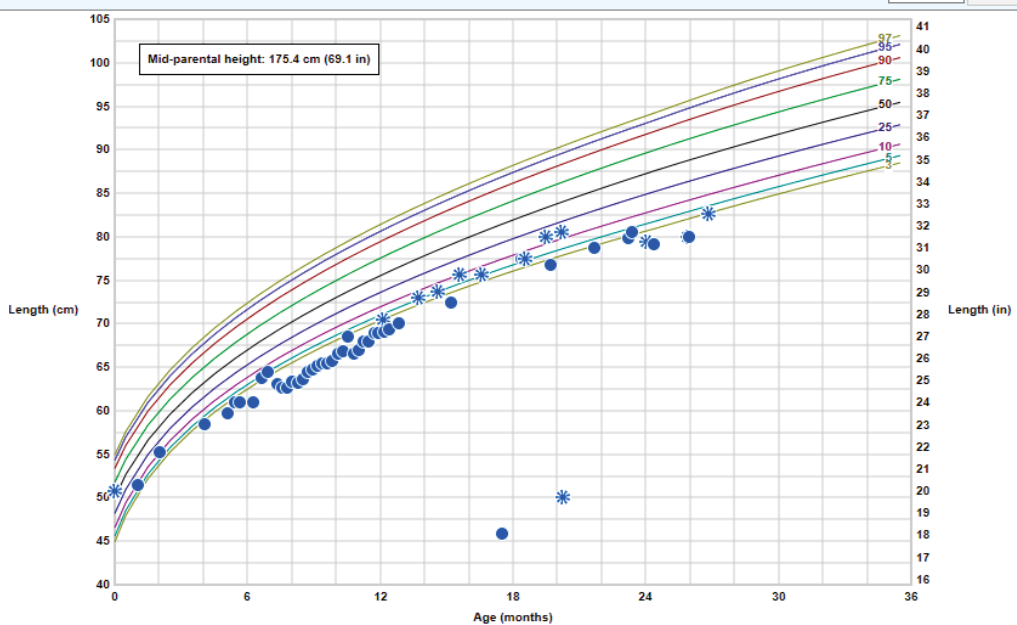

Source: Centers for Disease Control and

# Weight for length percentiles (Boys, birth to 36 months)

Weight-for-length Percentiles (Boys, birth to 36 months)

100 % 100 %

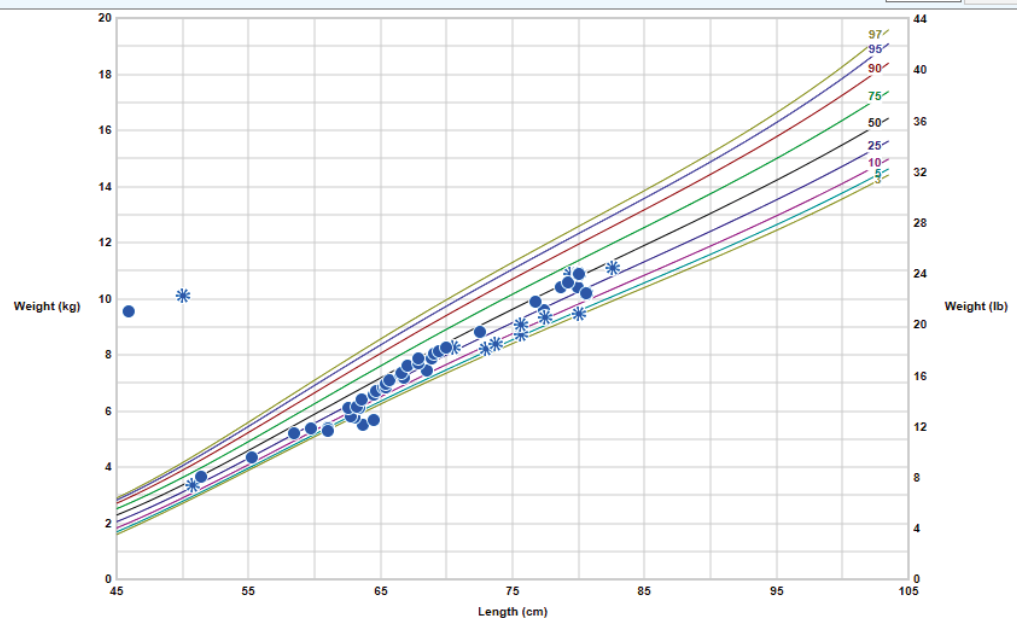

Source: Centers for Disease Control and

Supplemental Figure 1A. Growth charts for Patient 1

### Weight for age percentiles (Girls, birth to 2 years)

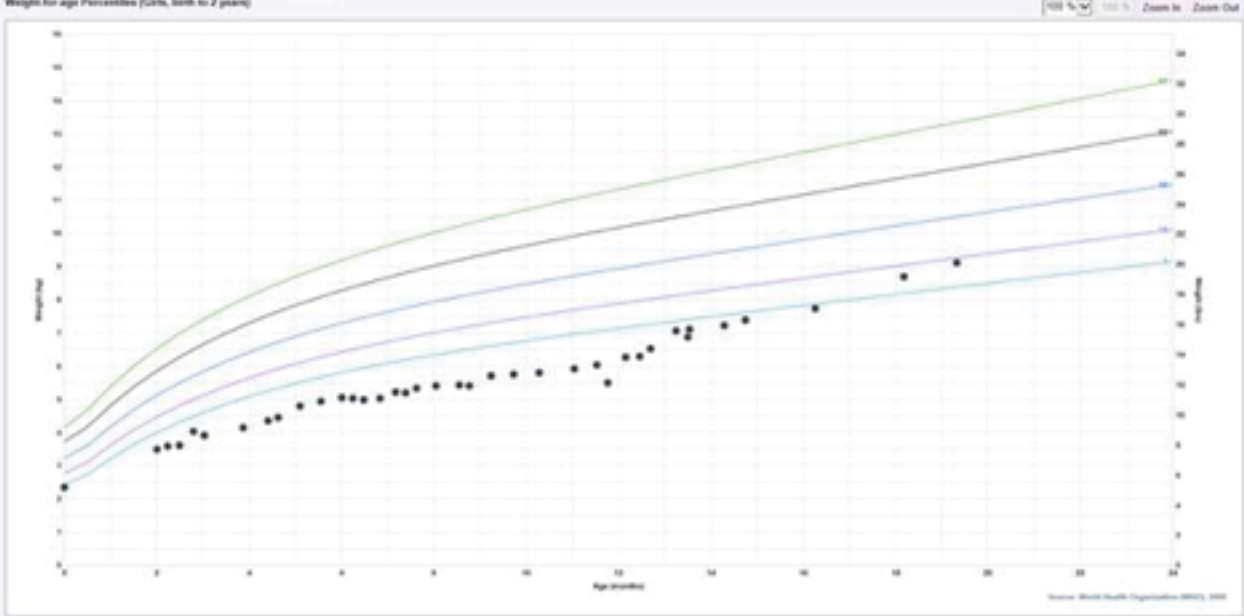

### Length for age percentiles (Girls, birth to 2 years)

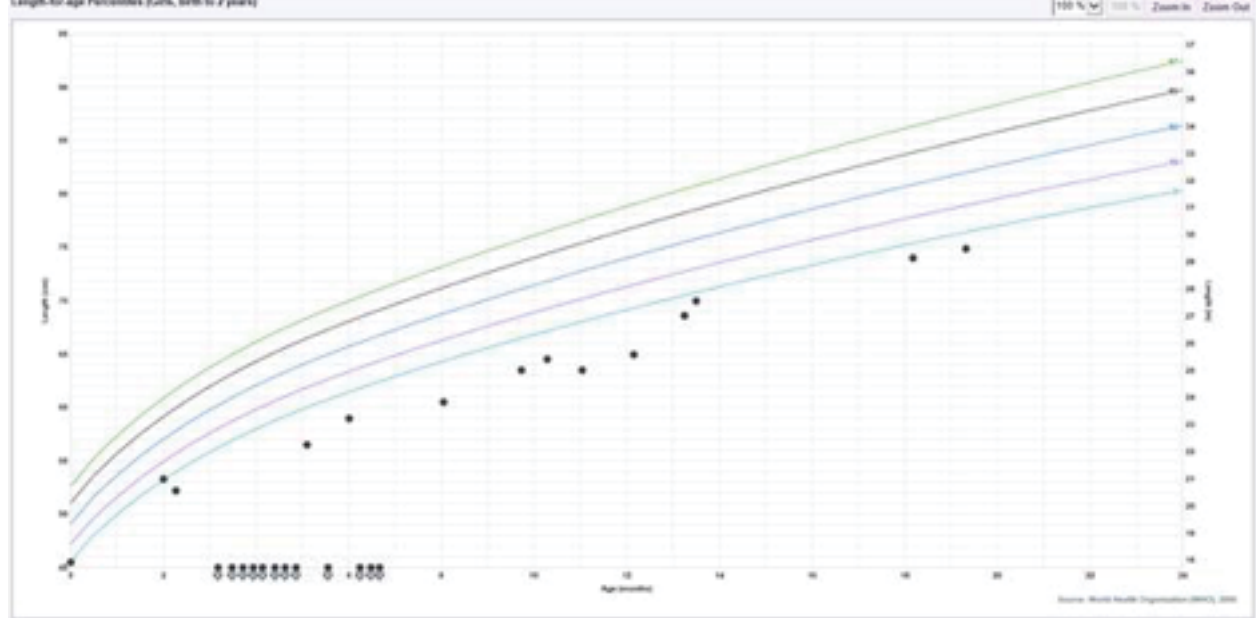

### Weight for length percentiles (Girls, birth to 2 years)

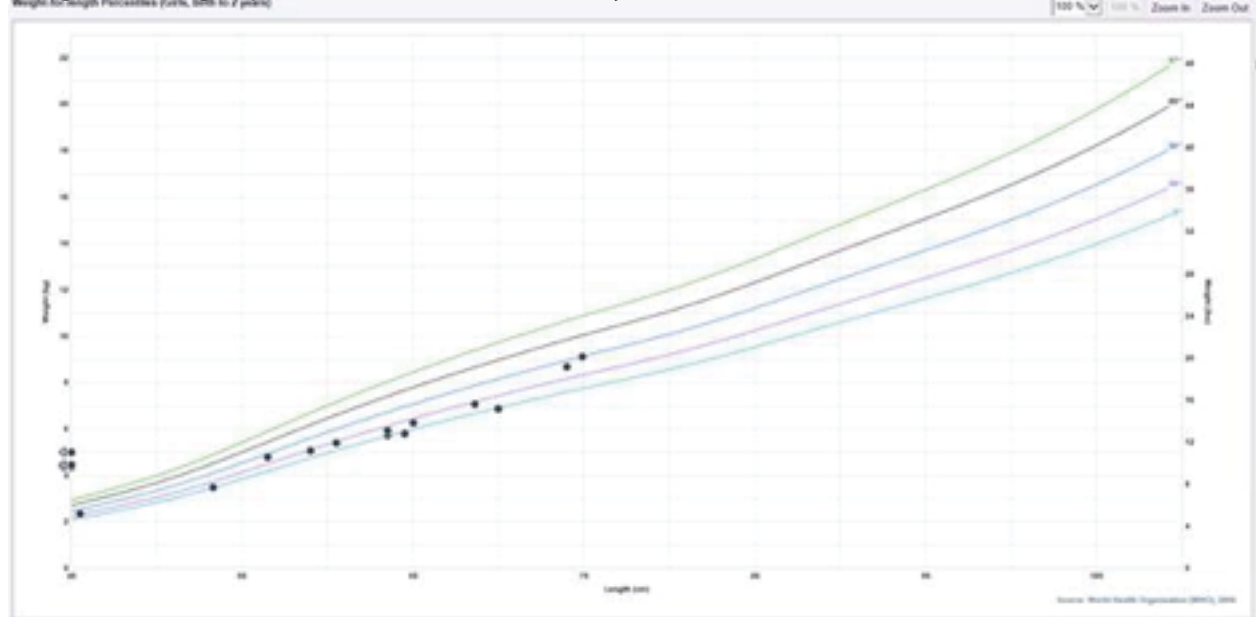

Supplemental Figure 1B. Growth charts for Patient 2
